# Supplementary figures and images for: Development of an atrazine immunoassay based on highly catalytically active Au@PtNPs and specific nanobody
Source: Research Square preprint supplement (doi:10.21203/rs.3.rs-7065158/v1), 2025-07-15

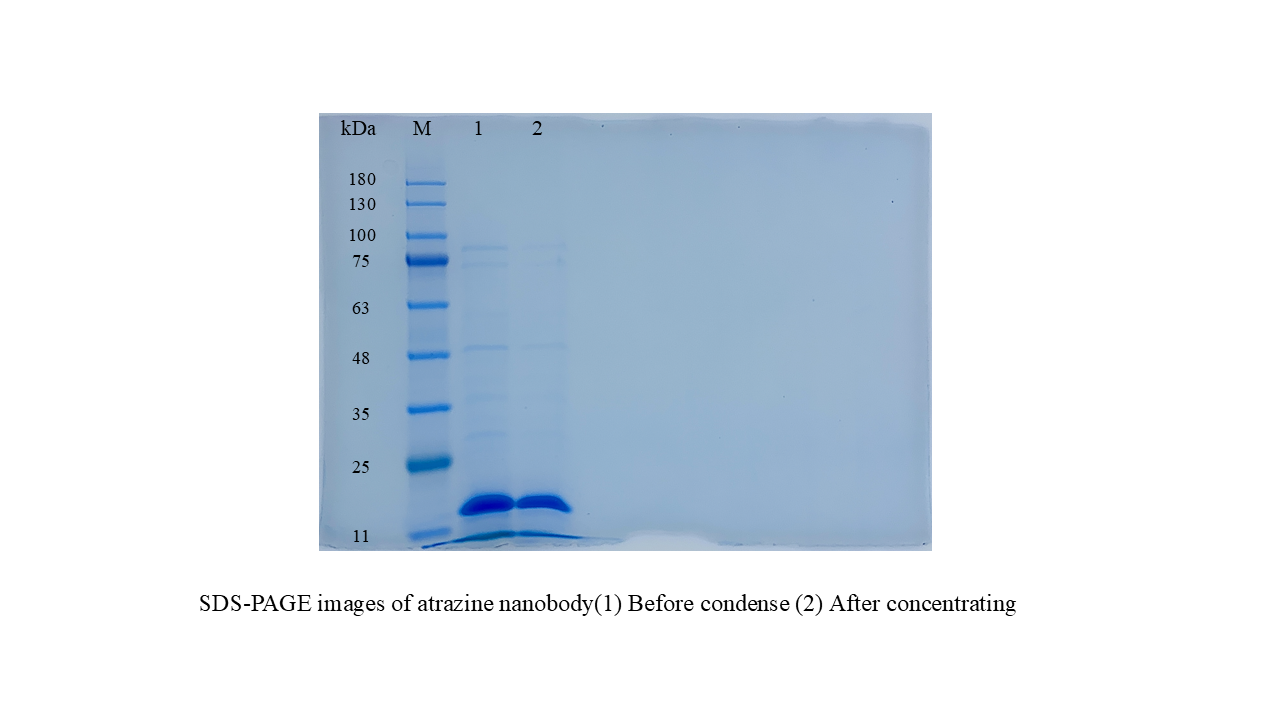

Supplement: Supplementary file 1 [file a0c69dcbb1bb2c39ba0212c5.docx]
